# Supplementary material
Source: bioRxiv or medRxiv preprint supplement (http://medrxiv.org/highwire/filestream/79248/field_highwire_adjunct_files/7/2020.04.30.20086884-4.pdf)
Supplement: Supplementary file [file 2020.04.30.20086884-4.pdf]

| Jurisdiction   | CFR    | Jurisdiction         | CFR    |
|----------------|--------|----------------------|--------|
| California     | 4.99%  | Kentucky             | 7.19%  |
| Texas          | 3.42%  | Oregon               | 4.97%  |
| Florida        | 4.14%  | Oklahoma             | 6.52%  |
| New York       | 12.65% | Connecticut          | 11.79% |
| Pennsylvania   | 8.89%  | Iowa                 | 4.61%  |
| Illinois       | 6.75%  | Utah                 | 1.22%  |
| Ohio           | 7.42%  | Nevada               | 5.53%  |
| Georgia        | 4.44%  | Arkansas             | 2.79%  |
| North Carolina | 7.50%  | Mississippi          | 5.97%  |
| Michigan       | 9.19%  | Kansas               | 7.28%  |
| New Jersey     | 8.13%  | New Mexico           | 6.16%  |
| Virginia       | 5.83%  | Nebraska             | 2.75%  |
| Washington     | 5.96%  | West Virginia        | 10.16% |
| Arizona        | 5.54%  | Idaho                | 3.79%  |
| Massachusetts  | 9.75%  | Hawaii               | 2.55%  |
| Tennessee      | 2.55%  | New Hampshire        | 4.58%  |
| Indiana        | 7.03%  | Maine                | 5.64%  |
| Missouri       | 4.98%  | Montana              | 2.55%  |
| Maryland       | 10.02% | Rhode Island         | 4.69%  |
| Wisconsin      | 7.75%  | Delaware             | 3.65%  |
| Colorado       | 6.10%  | South Dakota         | 2.55%  |
| Minnesota      | 16.60% | North Dakota         | 2.55%  |
| South Carolina | 3.26%  | Alaska               | 2.55%  |
| Alabama        | 4.60%  | District of Columbia | 5.20%  |
| Louisiana      | 6.47%  | Vermont              | 7.36%  |
|                |        | Wyoming              | 2.55%  |

**S3 Table CFR for all states.** The predicted CFR for all states shows significant variability across states.
